# Supplementary material for: Effects of Quality Enhancement of Frozen Tuna Fillets Using Ultrasound-Assisted Salting: Physicochemical Properties, Histology, and Proteomics
Source: MDPI journal article supplement (doi:10.3390/foods13040525), 2024-02-08
Supplement: s1 [file s1]

Table S1 The DAPs identified by 4D label-free analysis found in SS vs NT comparison.

Table S2 The DAPs identified by 4D label-free analysis found in UAS vs NT comparison.

Figure. S1 Ribosome pathway diagram.

Figure. S2 Glycine, serine and threonine metabolism pathway map.

Figure. S3 Preteasome pathway diagram

**Table S1.** The DAPs identified by 4D label-free analysis found in SS vs NT comparison.

| Accession  | Description                                               | Fold Change | Regulate |
|------------|-----------------------------------------------------------|-------------|----------|
| A0A0D6HEX0 | 30S ribosomal protein S2                                  | 32.00       | up       |
| A0A1A8UYI2 | Carboxypeptidase Z                                        | 32.00       | up       |
| A0A6A5E9L6 | Ryanodine receptor 3                                      | 32.00       | up       |
| A0A2K5RYN0 | Neuropathy target esterase isoform X1                     | 32.00       | up       |
| A0A6J2PA96 | Titin-like                                                | 11.46       | up       |
| A0A673C6F1 | Hematopoietic progenitor cell antigen CD34-like           | 2.17        | up       |
| A0A4W6EL06 | Dihydropyrimidinase-related protein 3                     | 2.05        | up       |
| A0A3Q1BF01 | Catenin delta 2                                           | 2.01        | up       |
| O75369     | Filamin-B                                                 | 1.97        | up       |
| Q9C0E8     | Endoplasmic reticulum junction formation protein lunapark | 1.80        | up       |
| A0A8B9X473 | Tubulin beta chain                                        | 1.80        | up       |
| A0A4W6BZ44 | Fibrillin-1                                               | 1.77        | up       |
| A0A8C9ZW02 | Myosin regulatory light polypeptide 9                     | 1.66        | up       |
| A0A672YR28 | Cellular retinoic acid-binding protein 2-like             | 1.53        | up       |
| A0A6G1QPP8 | Cytochrome c oxidase subunit                              | 1.49        | up       |
| A0A2I3BRX8 | Muscleblind like splicing factor 2                        | 1.47        | up       |
| A0A4U5UCU2 | Neuroblast differentiation-associated protein AHNAK       | 1.46        | up       |
| Q14315     | Filamin-C                                                 | 1.42        | up       |
| A0A6P7HMI4 | Nesprin-2                                                 | 1.40        | up       |
| A0A7N8WWZ3 | Aconitate hydratase, mitochondrial                        | 1.40        | up       |
| I3JRM6     | Copine-9                                                  | 1.39        | up       |
| A0A8C4DAC4 | Spectrin beta chain                                       | 1.32        | up       |
| A0A3Q4I6E8 | proton-translocating NAD(P)(+) transhydrogenase           | 1.31        | up       |
| A0A4Z2BDY8 | ATP-synt_ab_N domain-containing protein                   | 1.30        | up       |
| A0A3Q1FAT4 | Ribosomal protein L19                                     | 0.76        | down     |
| A0A2Y9JWH0 | E2 ubiquitin-conjugating enzyme                           | 0.76        | down     |
| A0A4W6E0V5 | Complement C3-like                                        | 0.75        | down     |
| A0A2R8Y5P7 | Histidine--tRNA ligase                                    | 0.75        | down     |
| W5PVR4     | 40S ribosomal protein S17                                 | 0.75        | down     |
| A0A668SG10 | Ribosomal protein L5                                      | 0.75        | down     |
| A0A671YIZ3 | 60S ribosomal protein L27a                                | 0.74        | down     |
| A0A668AZV5 | Apolipoprotein M                                          | 0.73        | down     |
| G3QSE8     | SMYD2 protein, partial                                    | 0.73        | down     |
| A0A8P4KRQ9 | Alpha-2-macroglobulin                                     | 0.73        | down     |
| A0A8P4G730 | Alpha-2-macroglobulin                                     | 0.73        | down     |
| A0A3P8TMU5 | Protein argonaute-2                                       | 0.72        | down     |
| A0A6G1PYJ1 | Peptidyl-prolyl cis-trans isomerase                       | 0.72        | down     |
| A0A4W6C231 | 60S ribosomal protein L27a                                | 0.72        | down     |
| P60901     | Proteasome subunit alpha type-6                           | 0.71        | down     |

|            |                                                                    |      |      |
|------------|--------------------------------------------------------------------|------|------|
| A0A2U9CGM8 | AIG1 domain containing protein                                     | 0.70 | down |
| A0A8J6ADN6 | Endophilin-B1                                                      | 0.70 | down |
| A0A3Q1JTP2 | 60S ribosomal protein L13a                                         | 0.69 | down |
| A0A8T2PP26 | Proteasome subunit alpha type                                      | 0.69 | down |
| A0A6G0I273 | Scavenger receptor cysteine-rich type 1 protein M130 Soluble CD163 | 0.68 | down |
| A0A7J8A684 | Eukaryotic translation initiation factor 4A2                       | 0.68 | down |
| A0A5E4CK54 | Casein kinase II subunit alpha                                     | 0.67 | down |
| A0A665W3I9 | Unc-45 myosin chaperone B                                          | 0.66 | down |
| A0A4W6EAC0 | Zinc binding alcohol dehydrogenase domain containing 2             | 0.66 | down |
| A0A7N6FDT0 | 40S ribosomal protein S11                                          | 0.65 | down |
| A0A673AGG9 | Exportin-1                                                         | 0.65 | down |
| A0A8E0RL11 | Ribosomal protein L3                                               | 0.64 | down |
| A0A3P8T7T6 | Myosin, heavy chain 10, non-muscle                                 | 0.63 | down |
| I3MFT1     | Proteasome subunit alpha type                                      | 0.63 | down |
| P17252     | Protein kinase C alpha type                                        | 0.62 | down |
| A0A6J2RTN1 | 60S ribosomal protein L21                                          | 0.62 | down |
| A0A7J7WEF8 | 40S ribosomal protein SA                                           | 0.61 | down |
| P04040     | Catalase                                                           | 0.56 | down |
| A0A157SWJ3 | Glycerol-3-phosphate-binding periplasmic protein                   | 0.54 | down |
| A0A3P8RVW1 | Betaine-homocysteine methyltransferase                             | 0.54 | down |
| A0A669F0Z4 | Adenylosuccinate synthetase                                        | 0.53 | down |
| A0A8C4DNK1 | Tripartite motif-containing protein 54                             | 0.52 | down |
| A0A8C9Z2W3 | Tryptase-2-like isoform X1                                         | 0.45 | down |
| A0A3P9C4E7 | GTPase IMAP family member 7-like                                   | 0.43 | down |
| P46940     | Ras GTPase-activating-like protein IQGAP1                          | 0.43 | down |
| L7N1C4     | Tubulin beta chain                                                 | 0.43 | down |
| A0A6G0I169 | Ribosome-releasing factor 2, mitochondrial                         | 0.40 | down |
| A0A6G0HWB5 | Tryptase alpha/beta-1                                              | 0.37 | down |
| A0A0D6GJX7 | Tryptophan synthase beta chain                                     | 0.36 | down |
| A0A254NFT7 | Acetyltransferase component of pyruvate dehydrogenase complex      | 0.32 | down |
| A0A0D6IWH2 | 50S ribosomal protein L1                                           | 0.30 | down |
| A0A0D6IWT2 | 50S ribosomal protein L5                                           | 0.28 | down |
| A0A672YCH6 | Troponin I, fast skeletal muscle-like                              | 0.23 | down |
| A0A2K6UC87 | Vacuolar proton pump subunit B                                     | 0.00 | down |
| A9IIZ1     | 30S ribosomal protein S3                                           | 0.00 | down |
| A0A254N3E4 | DNA-directed RNA polymerase subunit beta                           | 0.00 | down |
| A0A8P4KPK4 | Fibronectin type-III domain-containing protein                     | 0.00 | down |

---

**Table S2.** The DAPs identified by 4D label-free analysis found in UAS vs NT comparison.

| Accession  | Description                                        | Fold Change | Regulate |
|------------|----------------------------------------------------|-------------|----------|
| A0A1A8UYI2 | Carboxypeptidase Z                                 | 32.00       | up       |
| A0A484C9N3 | Ryanodine receptor 3                               | 32.00       | up       |
| A0A2K5RYN0 | neuropathy target esterase isoform X1              | 32.00       | up       |
| A0A0D6HEX0 | 30S ribosomal protein S2                           | 32.00       | up       |
| A0A2S2Q4N0 | T-complex protein 1 subunit epsilon                | 1.66        | up       |
| A0A813QT15 | T-complex protein 1 subunit alpha                  | 1.53        | up       |
| Q6ZWT7     | Lysophospholipid acyltransferase 2                 | 1.51        | up       |
| A0A6J3JCF0 | COP9 signalosome complex subunit 5 isoform X1      | 1.37        | up       |
| A0A6I9PSR5 | Calpain small subunit 1-like                       | 1.34        | up       |
| A0A671V9Z8 | AHNAK nucleoprotein                                | 1.31        | up       |
| A0A7J8A684 | Eukaryotic translation initiation factor 4A2       | 0.77        | down     |
| A0A4W6G1F7 | Glucose-6-phosphate isomerase                      | 0.77        | down     |
| A0A6G0HLR0 | Microtubule-associated protein                     | 0.75        | down     |
| A0A665WMJ5 | 60S ribosomal protein L9                           | 0.74        | down     |
| A0A665WMJ9 | Heat shock protein HSP 90-alpha                    | 0.74        | down     |
| A0A8C4DHT3 | Betaine-homocysteine methyltransferase             | 0.72        | down     |
| A0A8C9WUM5 | coproporphyrinogen oxidase                         | 0.72        | down     |
| A0A671YIZ3 | 60S ribosomal protein L27a                         | 0.72        | down     |
| A0A8I3PLT0 | 60S ribosomal protein L13a                         | 0.71        | down     |
| A0A3Q1HWE8 | AP-2 complex subunit alpha                         | 0.71        | down     |
| P02205     | Myoglobin                                          | 0.70        | down     |
| A0A8X8BQQ2 | Unc-45 myosin chaperone B                          | 0.70        | down     |
| P07954     | Fumarate hydratase, mitochondrial                  | 0.69        | down     |
| A0A9J7EMQ5 | ADP,ATP carrier protein (ADP/ATP translocase)      | 0.69        | down     |
| A0A3P8RVW1 | Betaine-homocysteine methyltransferase             | 0.63        | down     |
| A0A8Q3WLN4 | LIM zinc finger domain containing 1                | 0.61        | down     |
| A0A8C9ZW51 | RAS like proto-oncogene A                          | 0.59        | down     |
| A0A3Q3EKR2 | Protein-glutamine gamma-glutamyltransferase 2-like | 0.57        | down     |
| L7N1C4     | Tubulin beta chain                                 | 0.56        | down     |
| P62890     | Large ribosomal subunit protein eL30               | 0.56        | down     |
| P17252     | Protein kinase C alpha type                        | 0.56        | down     |
| A0A8C4I4V8 | Adenylosuccinate synthetase                        | 0.56        | down     |
| A0A8E0RL11 | Ribosomal protein L3                               | 0.55        | down     |
| A0A484CKC6 | peptidylprolyl isomerase                           | 0.55        | down     |
| A0A4W5LP36 | Myosin tail domain-containing protein              | 0.53        | down     |
| A0A3P8S9R6 | SEC22 homolog B, vesicle trafficking protein b     | 0.49        | down     |
| A0A254NCS3 | ATP synthase subunit beta                          | 0.49        | down     |
| A0A3P8T7T6 | Myosin heavy chain 10                              | 0.46        | down     |
| A0A3Q3X6Z4 | Apolipoprotein M                                   | 0.44        | down     |
| A0A8C4DNK1 | Tripartite motif containing 101                    | 0.43        | down     |
| A0A1I6KL50 | Elongation factor G                                | 0.39        | down     |

|            |                                                               |      |      |
|------------|---------------------------------------------------------------|------|------|
| A0A672YCH6 | Troponin I, fast skeletal muscle-like                         | 0.38 | down |
| A0A0D6H042 | Putrescine-binding periplasmic protein                        | 0.36 | down |
| A0A2I4AWM6 | Myosin-7-like                                                 | 0.34 | down |
| A0A0D6IWT2 | 50S ribosomal protein L5                                      | 0.32 | down |
| A0A3Q1HUI9 | peptidylprolyl isomerase                                      | 0.31 | down |
| A0A0D6GJX7 | Tryptophan synthase beta chain                                | 0.29 | down |
| Q79GC6     | Elongation factor Tu                                          | 0.26 | down |
| A0A6G0I169 | Ribosome-releasing factor 2, mitochondrial                    | 0.21 | down |
| A0A0D6IWH2 | 50S ribosomal protein L1                                      | 0.17 | down |
| O66206     | Chaperonin GroEL                                              | 0.07 | down |
| A0A1I6LI20 | Acetyltransferase component of pyruvate dehydrogenase complex | 0.07 | down |
| A9IIZ1     | Small ribosomal subunit protein uS3                           | 0.00 | down |
| P46940     | Ras GTPase-activating-like protein IQGAP1                     | 0.00 | down |
| A0A254N3E4 | DNA-directed RNA polymerase subunit beta                      | 0.00 | down |
| A0A0D6GQ54 | Outer membrane protein assembly factor BamD                   | 0.00 | down |

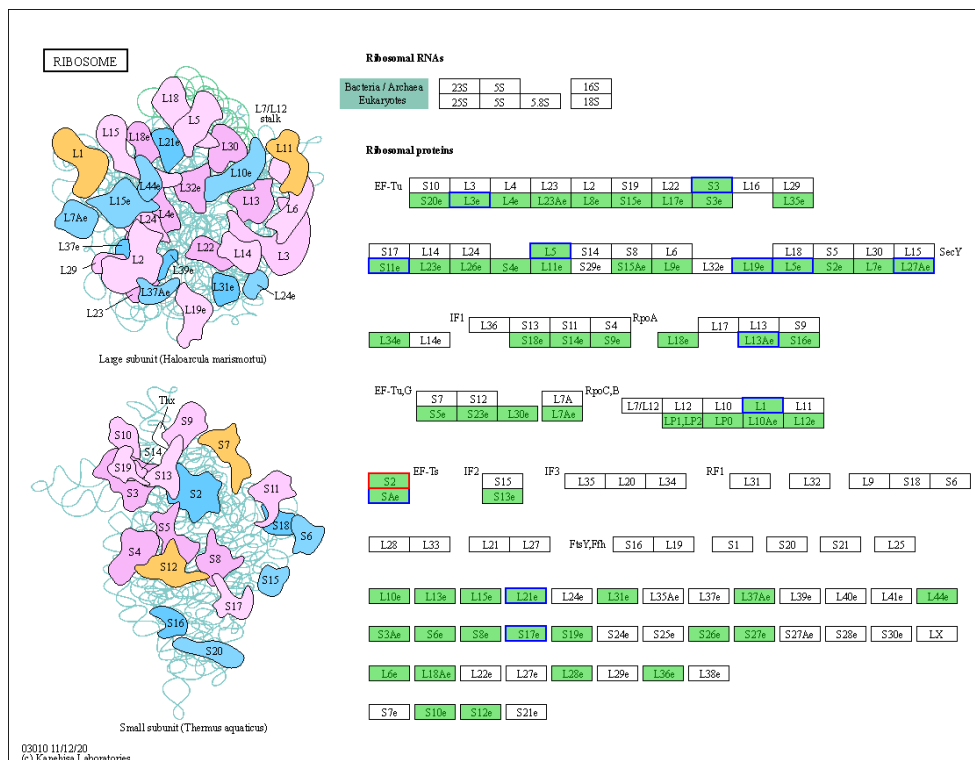

**Figure S1.** Ribosome pathway diagram. The green fills indicate the identified proteins in SS vs NT comparison, where red boxes indicate up-regulated DAPs and blue boxes indicate down-regulated DAPs.

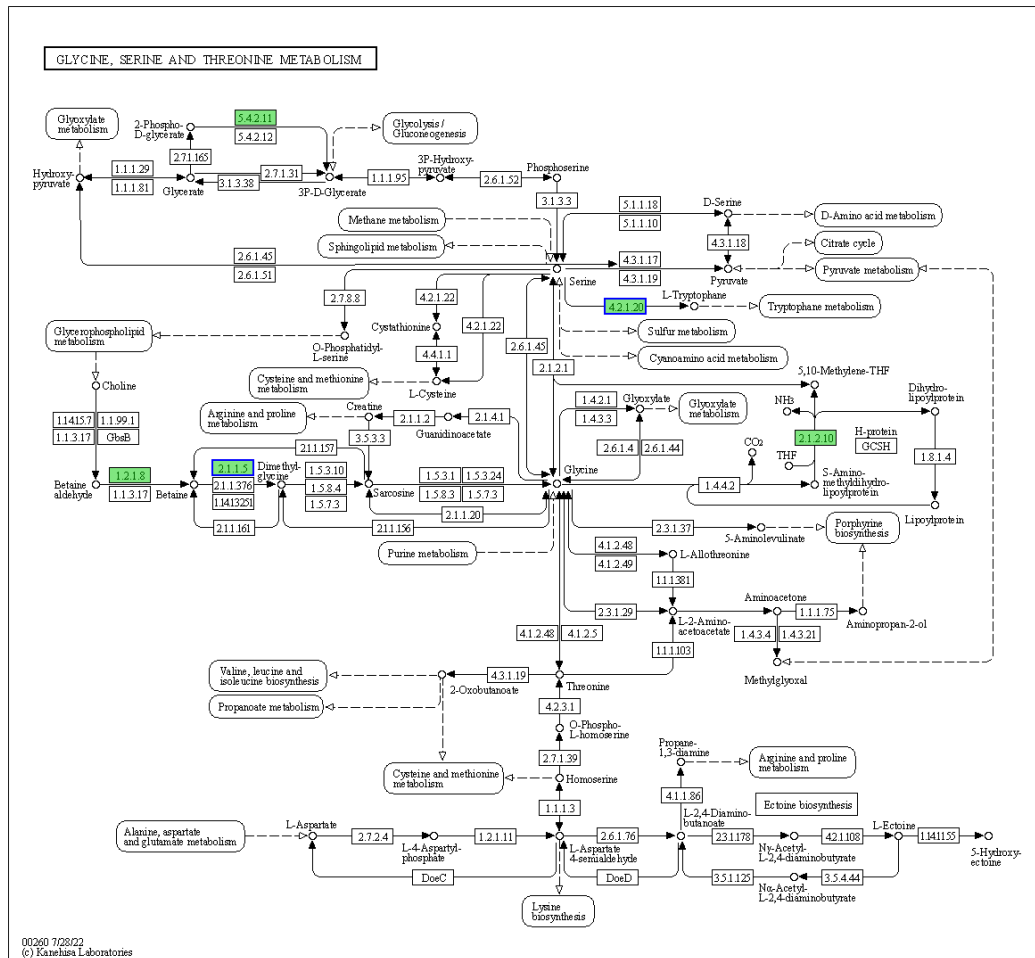

**Figure. S2.** Glycine, serine and threonine metabolism pathway map. The green fills indicate the identified proteins in UAS vs NT comparison, where red boxes indicate up-regulated DAPs and blue boxes indicate down-regulated DAP.

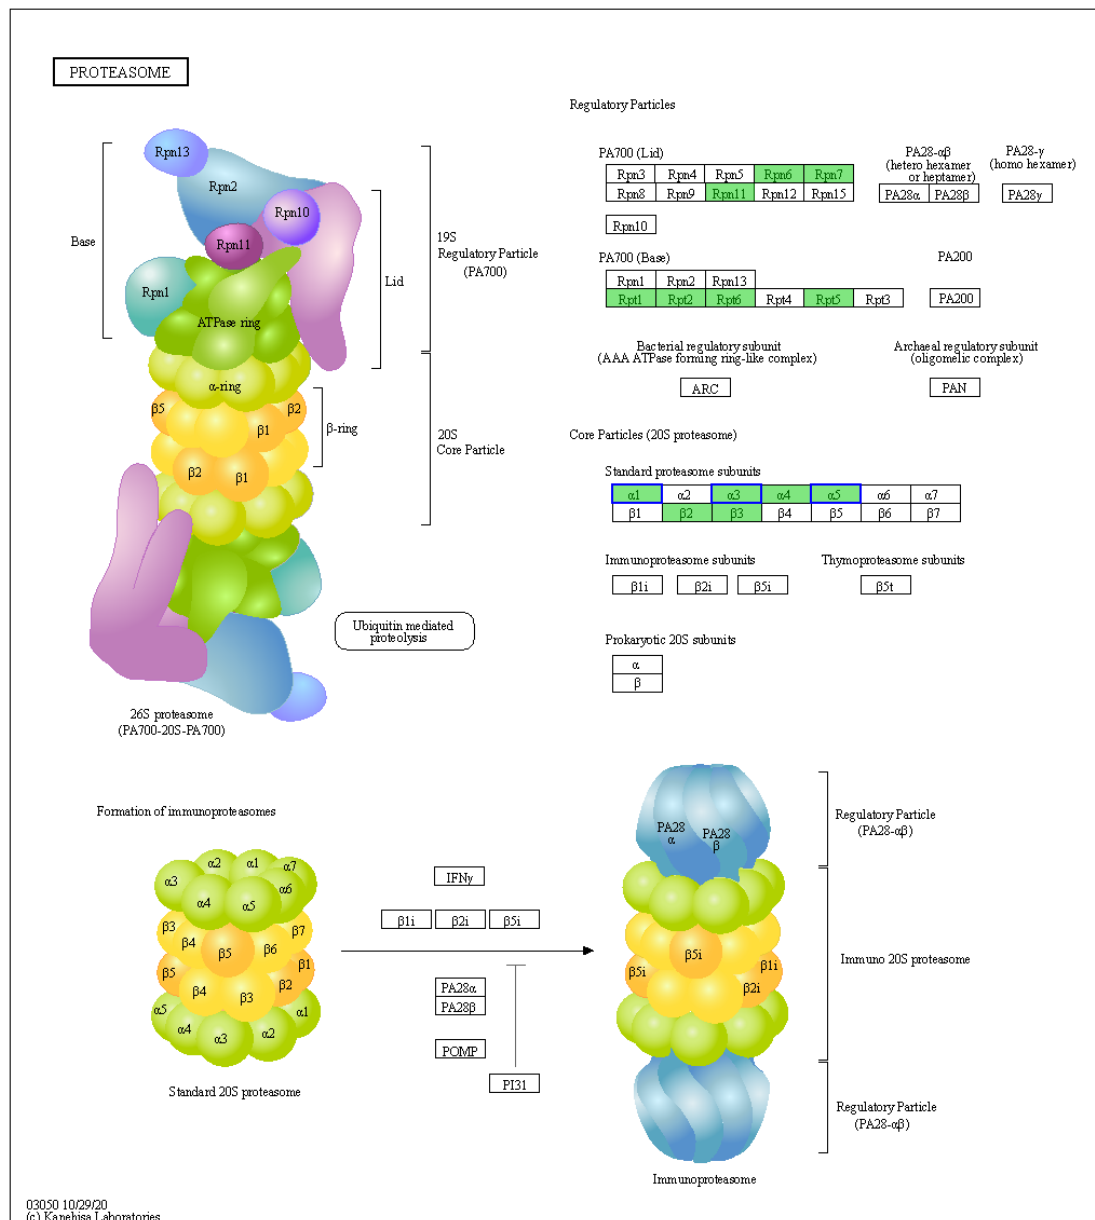

**Figure. S3.** Proteasome pathway diagram. The green fills indicate the identified proteins in SS vs NT comparison, where red boxes indicate up-regulated DAPs and blue boxes indicate down-regulated DAPs.
